# Supplementary material
Source: PubMed Central journal article supplement (PMC3337123)
Supplement: gmic-3-35-s5.pdf [file gmic-3-35-s5.pdf]

**Supplemental Material to:**

Numan Oezguen, Trevor D. Power, Petri Urvil, Hanping Feng, Charalabos Pothoulakis, Jonathan S. Stamler, Werner Braun and Tor C. Savidge. Clostridial toxins: Sensing a target in a hostile gut environment. *Gut Microbes* 2012; 3(1):

<http://dx.doi.org/10.4161/gmic.3.1.19250>

<http://www.landesbioscience.com/journals/gutmicrobes/article/19250/>

AMBER force field parameters for  $\text{InsP}_6$  were generated in-house using the standard procedure described in the AMBER manual for determining parameters for new compounds. By geometrically optimizing the parameters for hydrogen atoms only, a gas-phase partial geometry optimization was performed on  $\text{InsP}_6$  at the Hartree-Fock level in basis set 6-31G(d) with GAUSSIAN03<sup>1</sup> as a 1) neutral species, 2) minus 6 anion and 3) minus 12 anion. Since the heavy atoms of  $\text{InsP}_6$  were supplied in the crystal structure, these atoms remained frozen in the crystal structure geometry during the optimization to default convergence criteria. Charges were approximated with RESP using the highest degree of symmetry for  $\text{InsP}_6$  at all 3 ionization states. The input for RESP was generated in a three-cycle procedure utilizing the Merz–Singh–Kollman<sup>2,3</sup> electrostatic potential charge fitting analysis from an ab initio gas-phase single-point calculation in GAUSSIAN03 at the Hartree–Fock level in basis set 6-31G(d).  
 Table S1: Calculated RESP partial charges for  $\text{InsP}_6$

|           | $\text{InsP}_6$ | $[\text{InsP}_6]^{6-}$ | $[\text{InsP}_6]^{12-}$ |
|-----------|-----------------|------------------------|-------------------------|
| <b>C1</b> | 0.134540        | -0.074038              | -0.227779               |
| <b>H1</b> | 0.085726        | 0.177874               | 0.228840                |
| <b>O1</b> | -0.435376       | -0.263488              | -0.049786               |
| <b>P1</b> | 1.164856        | 1.045046               | 1.026972                |
| <b>O2</b> | -0.743376       | -0.814017              | -0.992749               |
| <b>O3</b> | -0.583007       | -0.646954              | N/A                     |
| <b>H2</b> | 0.479822        | 0.389592               | N/A                     |

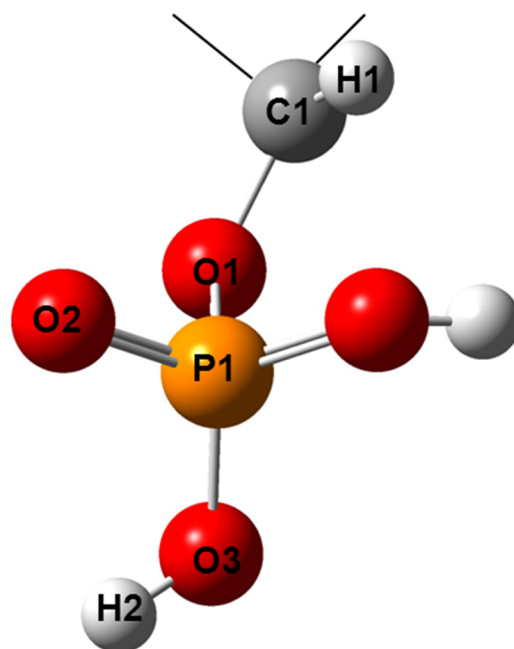

Figure S1: Definition of the atom names used in Table S1. To test which of the three  $\text{InsP}_6$  forms (neutral,  $6^-$  or  $12^-$  total charge) should be used in the MD-simulations, we performed MD-simulations of the  $\text{RTX}_{\text{VC}}$  crystal structure 3FZY including bound  $\text{InsP}_6$ . The form that carries a total charge of  $12^-$  reproduced the crystal structure with least deviation (Figure S2c).

**a: Neutral InsP<sub>6</sub>**

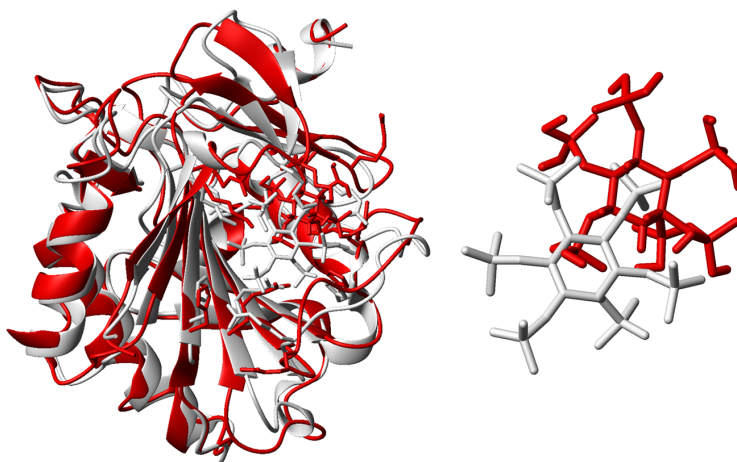

**b: [InsP<sub>6</sub>]<sup>6-</sup>**

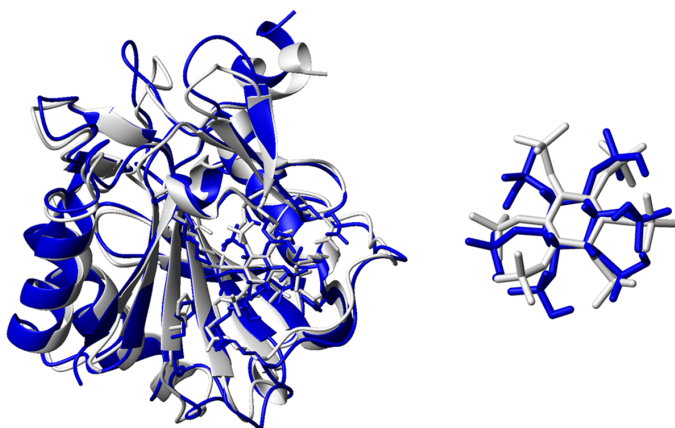

**c: [InsP<sub>6</sub>]<sup>12-</sup>**

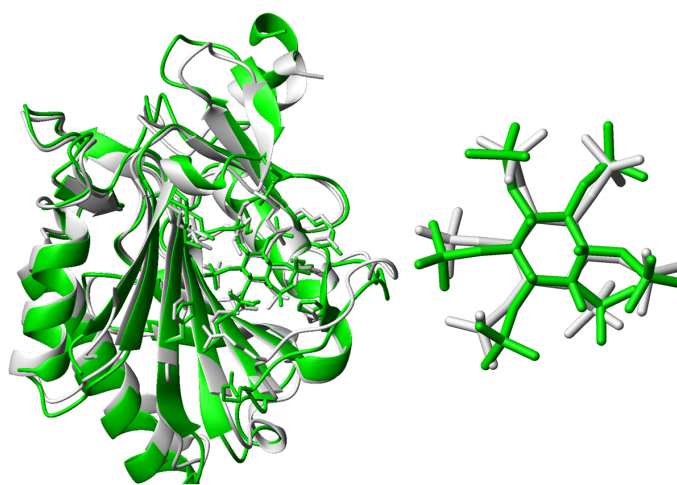

Figure S2: Alignment of the RTX<sub>VC</sub> crystal structure 3FZY (in grey) with conformations of the same after 5ns MD-simulation (in red, blue and green). Panel a, b and c show the result of the MD-simulation with different parameter sets for InsP<sub>6</sub> (neutral, -6 and -12 total charge). On the right are views to the alignment in the InsP<sub>6</sub> region.

### Movie legends

Legends for movies 1 and 3: MD-simulation of the TcdA crystal structure (3HO6; video 1) and RTX<sub>vc</sub> (3EEB; video 3) without the InsP<sub>6</sub> bound. The color of the ribbon indicates the simulation time (red at the beginning and blue at the end after 10 ns simulation). Please note that the movie starts with the end at 10 ns and progresses back towards the beginning of the simulation (towards the crystal structure). Highlighted residues from the right to the left are the catalytic triad Asp (red), His (blue), Cys (yellow), activity regulating Glu (red) and Trp (grey) on the  $\beta$ -flap (green). Green dotted lines are H-bonds.

Legend for movies 2 and 4: MD-simulation of the long model of TcdB (based on the TcdB crystal structure 3PA8 and RTX<sub>VC</sub> crystal structure 3FZY; movie 2) and RTX<sub>vc</sub> (3FYZ; movie 4) without the InsP<sub>6</sub> bound. The color of the ribbon indicates the simulation time (red at the beginning and blue at the end after 5 ns simulation). Please note that the movie starts with the end at 5 ns and progresses back towards the beginning of the simulation (towards the crystal structure). Highlighted residues from the right to the left are the catalytic triad Asp (red), His (blue), Cys (yellow), activity regulating Glu (red) and Trp (grey) on the  $\beta$ -flap (green). Green dotted lines are H-bonds.

### Supplement References

1. Gaussian 03, Revision C.02, M. J. Frisch, G. W. Trucks, H. B. Schlegel, G. E. Scuseria, M. A. Robb, J. R. Cheeseman, J. A. Montgomery, Jr., T. Vreven, K. N. Kudin, J. C. Burant, J. M. Millam, S. S. Iyengar, J. Tomasi, V. Barone, B. Mennucci, M. Cossi,

G. Scalmani, N. Rega, G. A. Petersson, H. Nakatsuji, M. Hada, M. Ehara, K. Toyota, R. Fukuda, J. Hasegawa, M. Ishida, T. Nakajima, Y. Honda, O. Kitao, H. Nakai, M. Klene, X. Li, J. E. Knox, H. P. Hratchian, J. B. Cross, C. Adamo, J. Jaramillo, R. Gomperts, R. E. Stratmann, O. Yazyev, A. J. Austin, R. Cammi, C. Pomelli, J. W. Ochterski, P. Y. Ayala, K. Morokuma, G. A. Voth, P. Salvador, J. J. Dannenberg, V. G. Zakrzewski, S. Dapprich, A. D. Daniels, M. C. Strain, O. Farkas, D. K. Malick, A. D. Rabuck, K. Raghavachari, J. B. Foresman, J. V. Ortiz, Q. Cui, A. G. Baboul, S. Clifford, J. Cioslowski, B. B. Stefanov, G. Liu, A. Liashenko, P. Piskorz, I. Komaromi, R. L. Martin, D. J. Fox, T. Keith, M. A. Al-Laham, C. Y. Peng, A. Nanayakkara, M. Challacombe, P. M. W. Gill, B. Johnson, W. Chen, M. W. Wong, C. Gonzalez, and J. A. Pople,

Gaussian, Inc., Wallingford CT, 2004.

2. Besler BH, Merz KMJ, Kollman PA. Atomic charges derived from semiempirical methods. *J Comput Chem* 1990;11:431–439.
3. UC, Kollman PA. An approach to computing electrostatic charges for molecules. *J Comput Chem* 1984;5:129–145.
